# Supplementary material for: Metal–organic framework (MOF)-derived plate-shaped CoS1.097 nanoparticles for an improved hydrogen evolution reaction
Source: Royal Society of Chemistry journal article supplement (doi:10.1039/d2dt01630c), 2022-01-01
Supplement: d2dt01630c1.pdf [file d2dt01630c1.pdf]

## Supporting Information

### **Metal-organic framework (MOF) derived plate-shaped CoS<sub>1.097</sub> nanoparticles for improved hydrogen evolution reaction**

*Nachiketa Sahu,<sup>a, b</sup> Jiban K. Das<sup>a, b</sup> and J. N. Behera<sup>a, b\*</sup>*

<sup>a</sup>School of Chemical Sciences, National Institute of Science Education and Research (NISER),  
An OCC of Homi Bhabha National Institute (HBNI), Khurdha, 752050, Odisha, India

<sup>b</sup>Centre for Interdisciplinary Sciences (CIS), NISER, 752050, Jatni, Odisha, India

E-mail: [jnbehera@niser.ac.in](mailto:jnbehera@niser.ac.in)

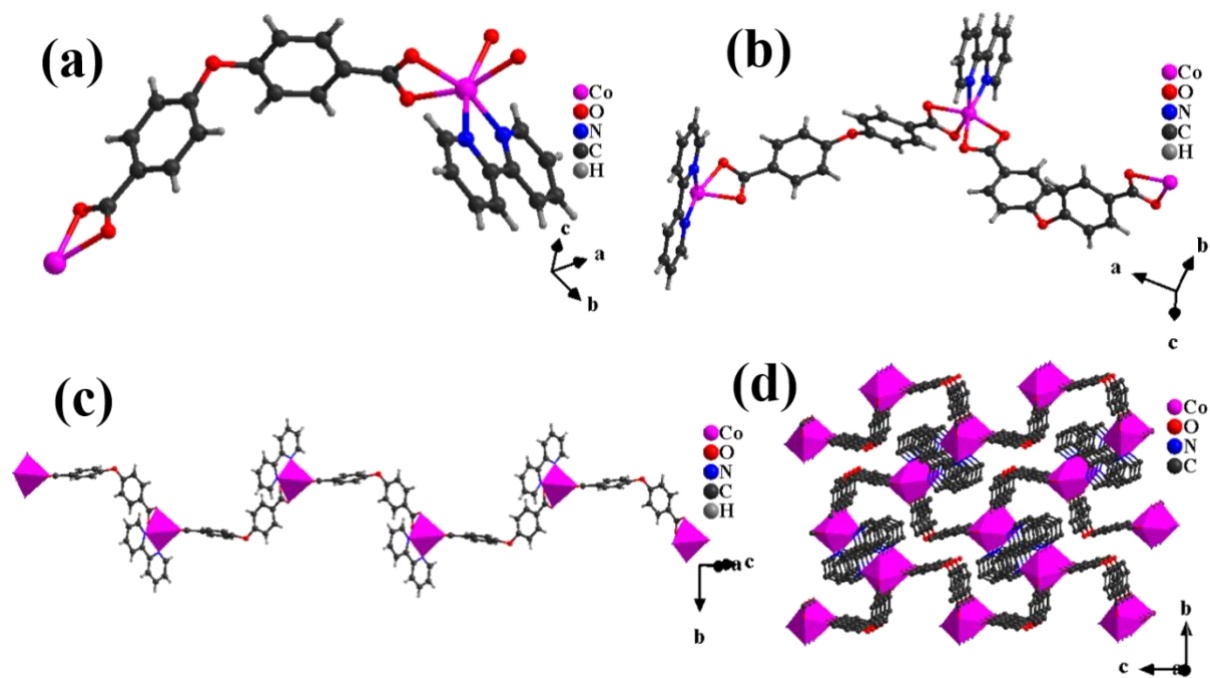

Fig. S1 Crystal structures arrangement of Co-MOF (a-d).

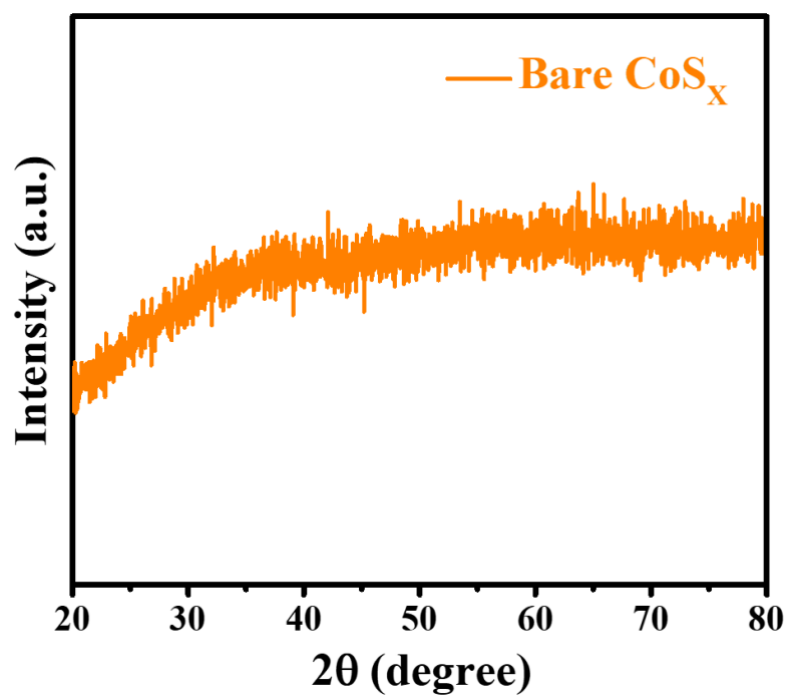

Fig. S2 X-ray diffraction study of bare  $\text{CoS}_x$ .

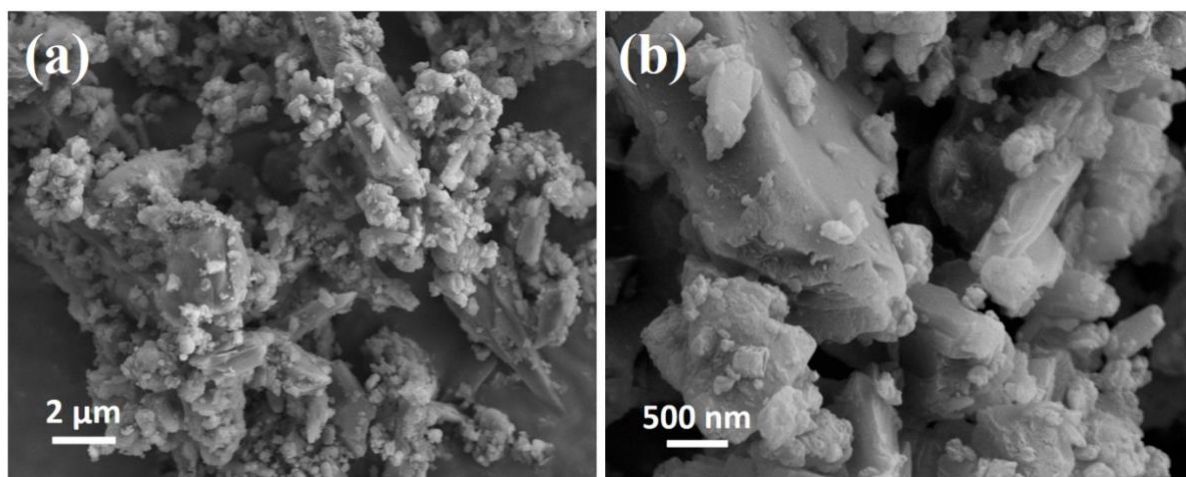

**Fig. S3** FESEM images of Co-MOF at lower to higher magnifications.

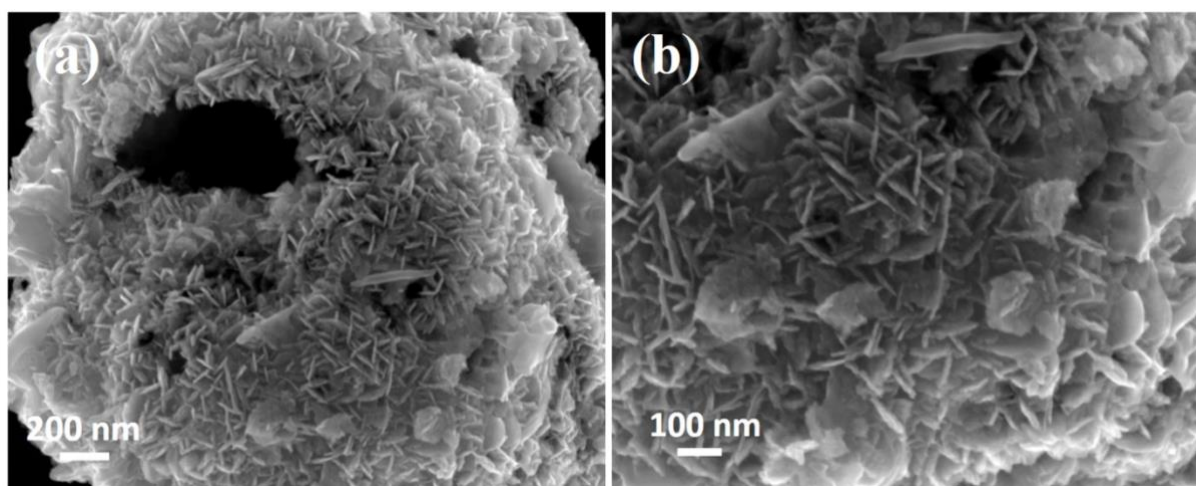

**Fig. S4** FESEM study of CoS<sub>1.097-140</sub> at varied magnifications.

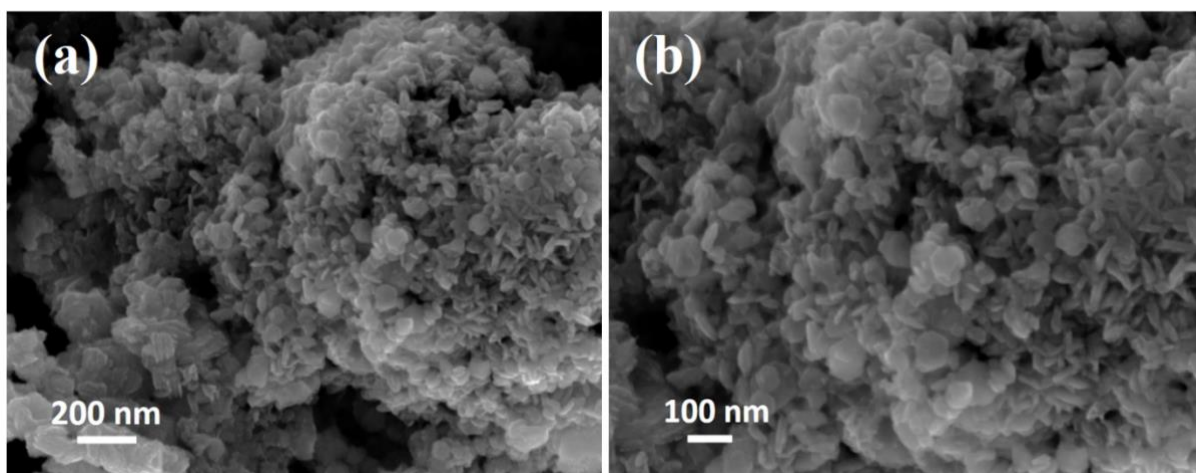

**Fig. S5** FESEM pictures of CoS<sub>1.097-180</sub> at different magnifications.

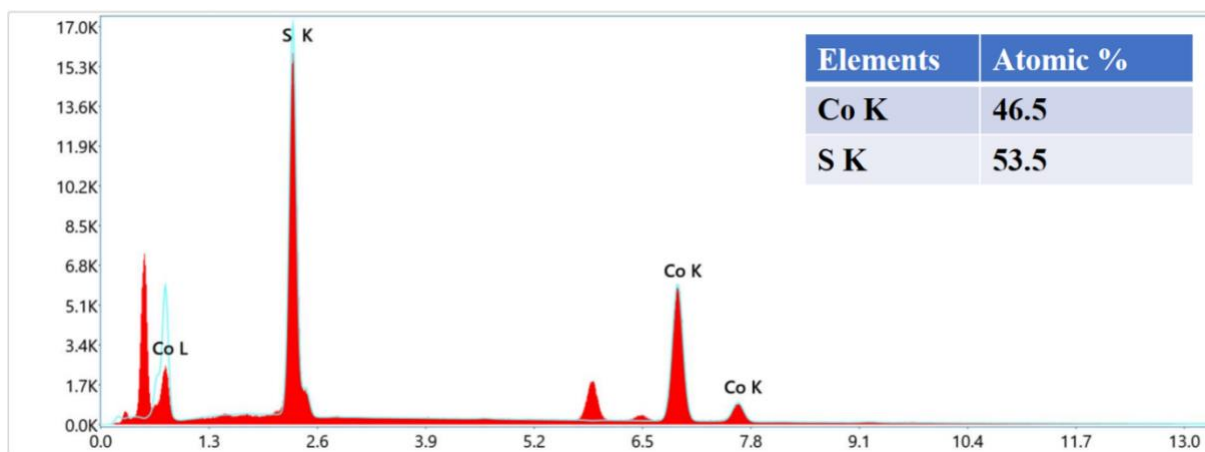

**Fig. S6** EDX spectrum of optimized  $\text{CoS}_{1.097-160}$  showing the presence and percentage of elements Co and S.

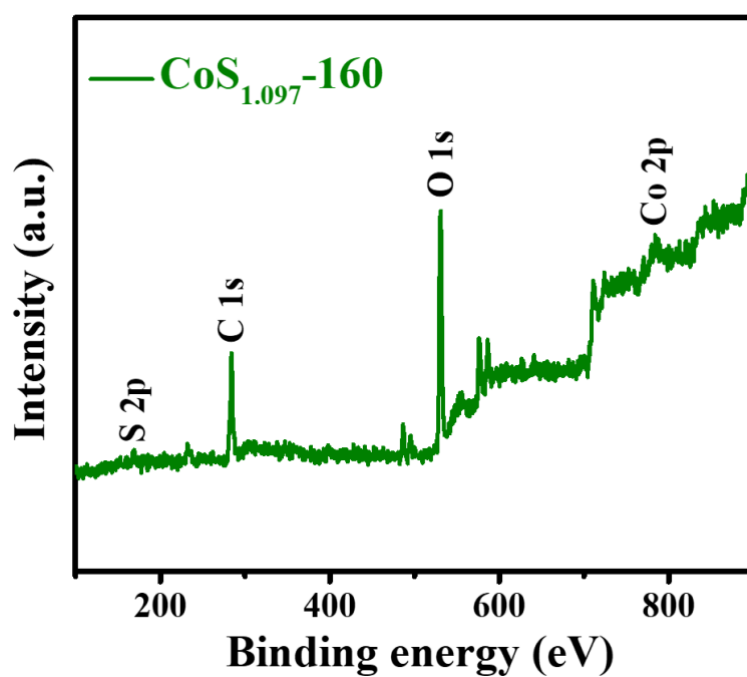

**Fig. S7** Full scan X-ray photoelectron survey spectrum of  $\text{CoS}_{1.097-160}$ .

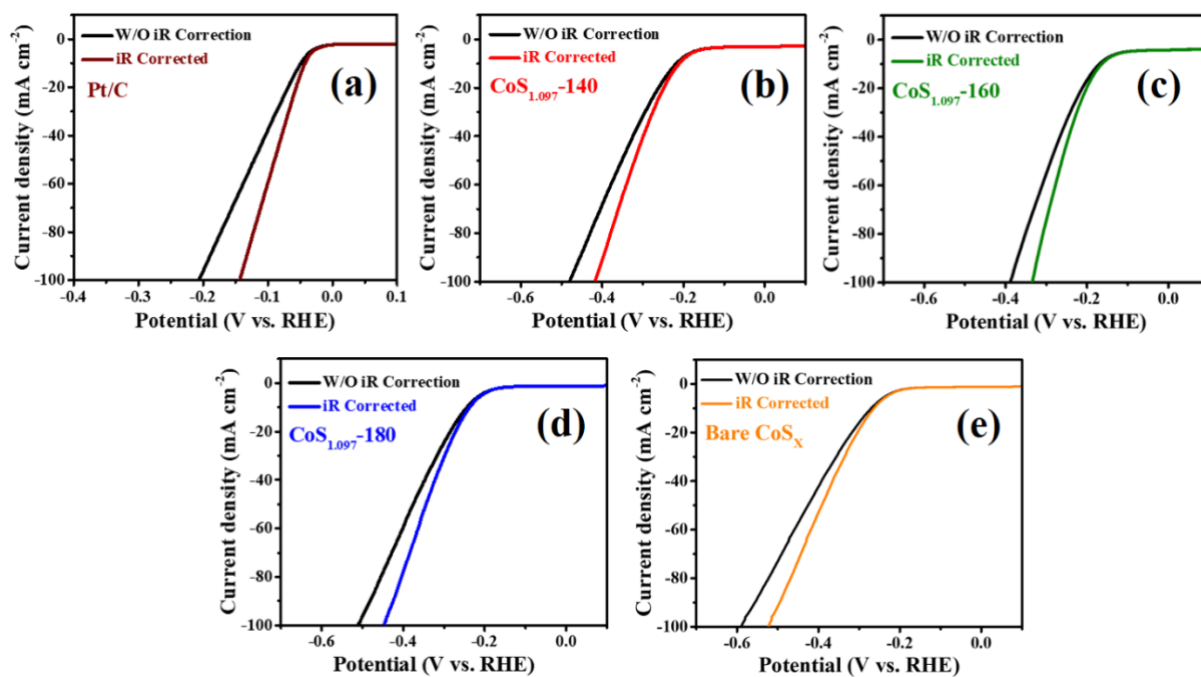

**Fig. S8** Polarization curves of CoS<sub>1.097</sub>-T products, Pt/C and bare CoS<sub>x</sub> before and after iR compensation.

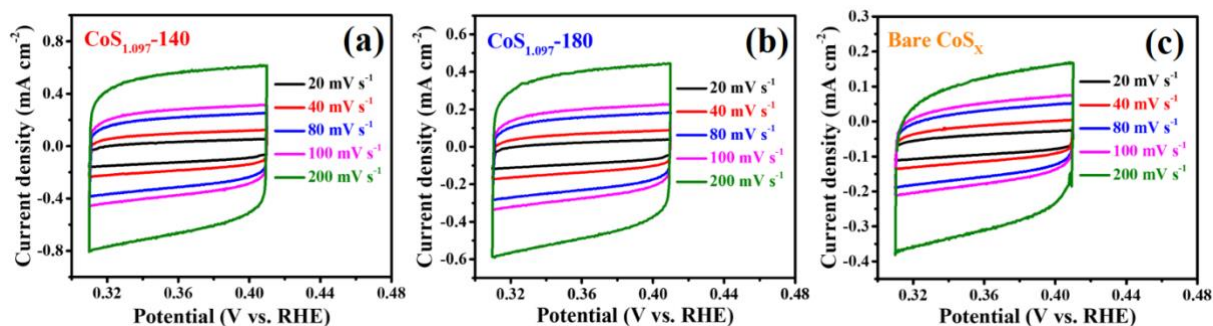

**Fig. S9** Cyclic voltammograms (CVs) of CoS<sub>1.097</sub>-140 (a), CoS<sub>1.097</sub>-180 (b) and bare CoS<sub>x</sub> (c) in a non-faradaic potential region of 0.31 V vs. RHE to 0.41 V vs. RHE.

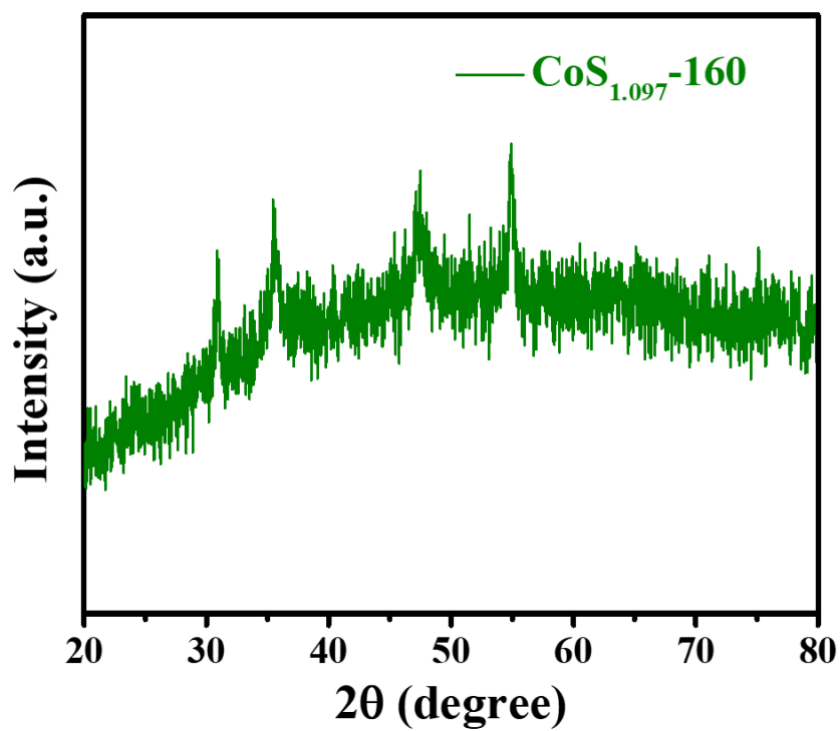

**Fig. S10** PXRD study of CoS<sub>1.097</sub>-160 after chronopotentiometry measurement of 25 h at 10 mA cm<sup>-2</sup> current density under acidic electrolytic conditions.

**Table S1.** Hydrogen evolution reaction (HER) comparison of cobalt sulfide-based electrocatalysts.

| <b>Electrocatalyst</b>                           | <b>Overpotential at 10 mA cm<sup>-2</sup> (mV)</b> | <b>Tafel slope (mV dec<sup>-1</sup>)</b> | <b>Electrolyte</b>                       | <b>References</b>                                 |
|--------------------------------------------------|----------------------------------------------------|------------------------------------------|------------------------------------------|---------------------------------------------------|
| CoS <sub>1.097</sub> /MoS <sub>2</sub>           | 228                                                | 59.7                                     | 0.5 M H <sub>2</sub> SO <sub>4</sub>     | ACS Appl. Energy Mater. 2019, 2, 10, 7504–7511    |
| CoP-CoS composite nanorods                       | 156                                                | 74                                       | 0.5 M H <sub>2</sub> SO <sub>4</sub>     | ChemCatChem 2019, 11, 6099– 6104                  |
| MoS <sub>2</sub> /Co <sub>3</sub> S <sub>4</sub> | 175                                                | 55.6                                     | 0.5 M H <sub>2</sub> SO <sub>4</sub>     | Electrochim. Acta 2018, 269, 262–273              |
| CoS <sub>2</sub>                                 | 192                                                | 52                                       | 0.5 M H <sub>2</sub> SO <sub>4</sub>     | J. Phys. Chem. C. 2014, 118, 21347–21356.         |
| CoS <sub>2</sub>                                 | 165                                                | 86.57                                    | 0.5 M H <sub>2</sub> SO <sub>4</sub>     | ACS Appl. Mater. Interfaces 2021, 13, 41573–41583 |
| Ni-doped CoS <sub>2</sub>                        | 156                                                | 52                                       | 0.5 M H <sub>2</sub> SO <sub>4</sub>     | Electrochim. Acta, 2017, 228, 428-435             |
| CoS <sub>2</sub> /CC                             | 288                                                | 210.7                                    | 0.5 M H <sub>2</sub> SO <sub>4</sub>     | J. Mater. Chem. A, 2015, 3, 22886-22891           |
| CoS <sub>2</sub> microwires                      | 158                                                | 58                                       | 0.5 M H <sub>2</sub> SO <sub>4</sub>     | J. Am. Chem. Soc., 2014, 136,10053-10061          |
| Co <sub>x</sub> S <sub>y</sub>                   | 188                                                | 96                                       | 0.5 M H <sub>2</sub> SO <sub>4</sub>     | ChemElectroChem 2018, 5, 3639–3644                |
| CoS-MoS <sub>2</sub>                             | 270                                                | 74                                       | 0.5 M H <sub>2</sub> SO <sub>4</sub>     | J. Solid State Electrochem. 2017, 21, 409–417     |
| <b>CoS<sub>1.097</sub>-160</b>                   | <b>163</b>                                         | <b>53</b>                                | <b>0.5 M H<sub>2</sub>SO<sub>4</sub></b> | <b>This Work</b>                                  |
